# Supplementary material for: Improved Surface-Enhanced Raman Scattering Properties of ZrO2 Nanoparticles by Zn Doping
Source: PubMed Central journal article supplement (PMC6669659; doi:10.3390/nano9070983), 2019-07-06
Supplement: nanomaterials-09-00983-s001.pdf [file nanomaterials-09-00983-s001.pdf]

## *Supplementary Material*

# **Improved Surface-enhanced Raman Scattering Properties of ZrO<sub>2</sub> Nanoparticles by Zn Doping**

**Peng Ji<sup>1,2</sup>, Zhu Mao<sup>2</sup>, Zhe Wang<sup>1</sup>, Xiangxin Xue<sup>3</sup>, Yu Zhang<sup>2</sup>, Jiaao Lv<sup>1</sup> and Xiumin Shi<sup>1,\*</sup>**

<sup>1</sup> College of Chemical Engineering, Changchun University of Technology, Changchun, China

<sup>2</sup> School of Chemistry and Life Science, Changchun University of Technology, Changchun, China

<sup>3</sup> Key Laboratory of Preparation and Applications of Environmental Friendly Materials, Jilin Normal University, Ministry of Education, Changchun, China

\* Correspondence: shixiumin@ccut.edu.cn; Tel.: +86-431-8571-6463

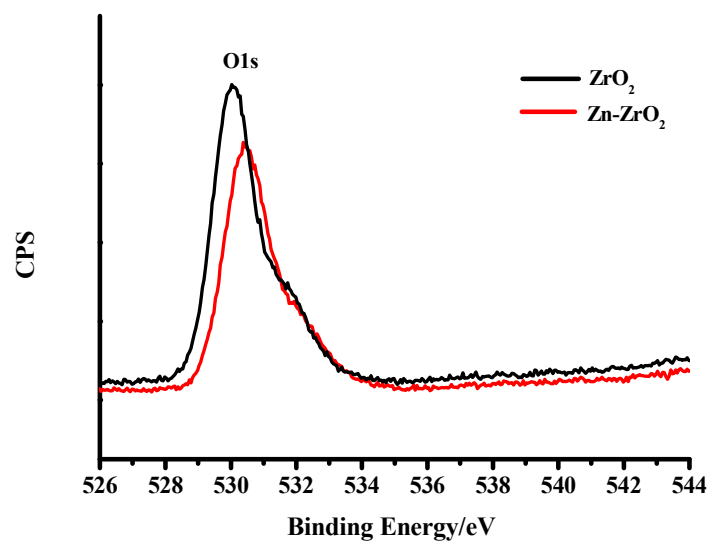

**Figure S1.** XPS spectra of O1s in  $\text{ZrO}_2$  and  $\text{Zn-ZrO}_2$  (1%) NPs.

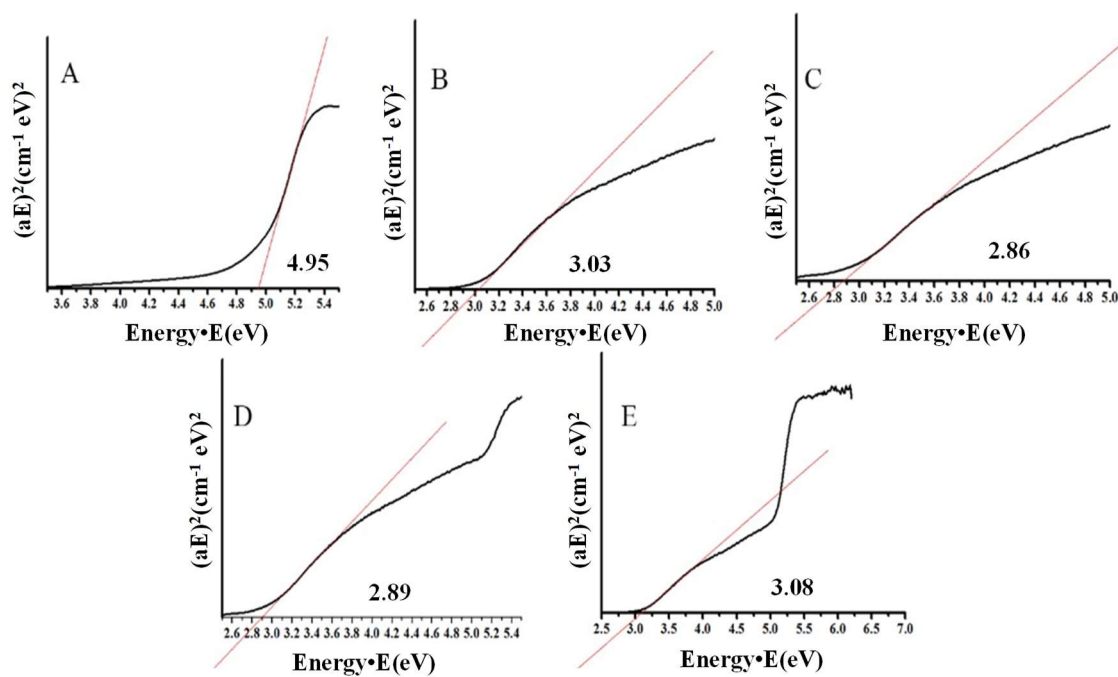

**Figure S2.** UV-vis DRS spectra of (A) pure  $\text{ZrO}_2$  nanoparticle, and Zn-doped  $\text{ZrO}_2$  nanoparticle (B) 0.5%, (C) 1%, (D) 3%, and (E) 5%.

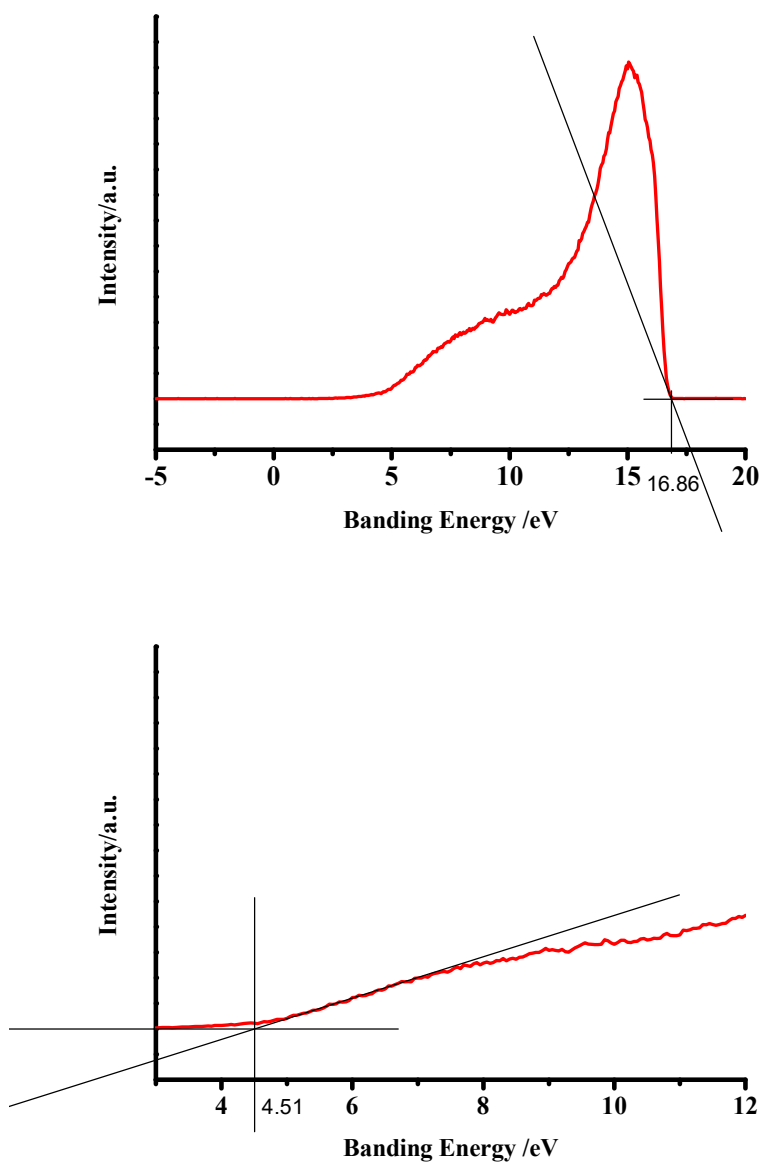

**Figure S3.** The ultraviolet photoelectron spectroscopy (UPS) of Zn-ZrO<sub>2</sub> (1%) nanoparticles.

Through the formula:  $WF=h\nu-\Delta E$ . According to Figure S3, the work function of Zn-ZrO<sub>2</sub> is 4.36 eV and the VB of Zn-ZrO<sub>2</sub> is situated at 8.87 eV. As the S2 shows, the UV-vis absorption band located at 433 nm. Thus, the band gap between VB and CB is 2.86 eV. The CB of Zn-ZrO<sub>2</sub> is situated at 6.01 eV.

**Table S1** Enhancement factor of 4-MBA adsorbed on ZrO<sub>2</sub> and Zn-ZrO<sub>2</sub> NPs (0.5%, 1%, 3%, and 5%).

| Zn-ZrO <sub>2</sub> /n% | 0                  | 0.5                | 1                  | 3                  | 5                  |
|-------------------------|--------------------|--------------------|--------------------|--------------------|--------------------|
| EF                      | $4.32 \times 10^3$ | $1.34 \times 10^4$ | $1.94 \times 10^4$ | $1.57 \times 10^4$ | $1.56 \times 10^4$ |
